# Supplementary material for: Optical Temperature Sensors Based on Down-Conversion Nd3+,Yb3+:LiYF4 Microparticles
Source: MDPI journal article supplement (doi:10.3390/photonics10040375), 2023-03-28
Supplement: s1 [file s1]

# Optical Temperature Sensors Based on Down-Conversion $\text{Nd}^{3+}, \text{Yb}^{3+}:\text{LiYF}_4$ Microparticles

Anna Ginkel <sup>1</sup>, Maksim Pudovkin <sup>1,\*</sup>, Ekaterina Oleynikova <sup>1</sup>, Stella Korableva <sup>1</sup>  
and Oleg Morozov <sup>1,2</sup>

<sup>1</sup> Institute of Physics, Kazan Federal University, 18th Kremlyovskaya Street, 420008 Kazan, Russia

<sup>2</sup> Zavoisky Physical-Technical Institute, FRC Kazan Scientific Center of RAS, Sibirskii Ave., 10/7, 420029 Kazan, Russia

\* Correspondence: jaz7778@list.ru

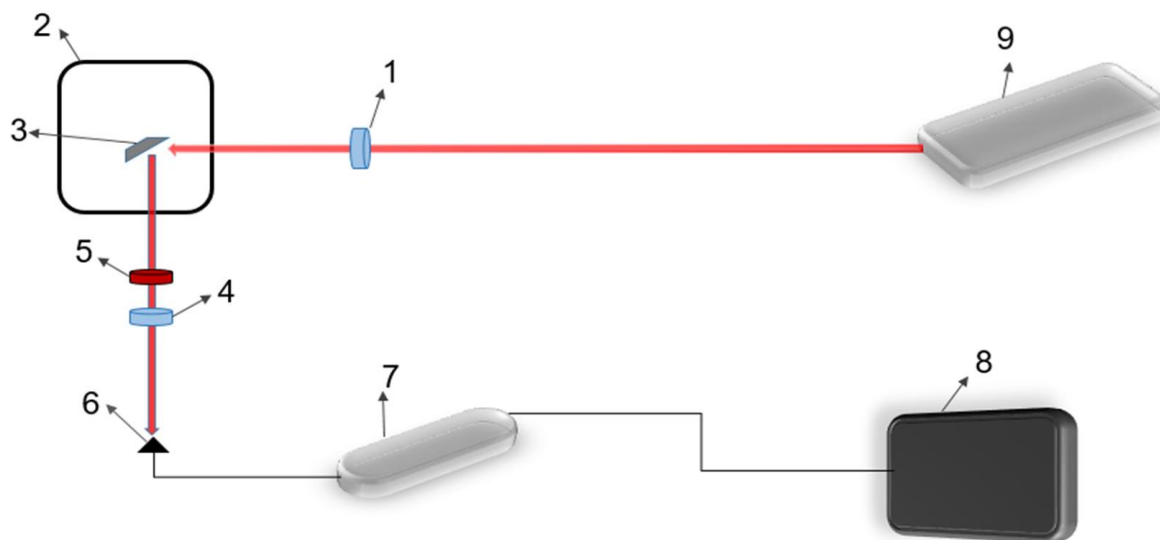

Figure S1. Experimental set-up. 1 and 4 are lenses, 2 and 3 are cryo-system and the sample, 5 – optical filter, 6 – waveguide, 7 – spectrometer, 8 – PC.

Table S1. Polynomial parameters for LIR

|                                                                |                                            |
|----------------------------------------------------------------|--------------------------------------------|
| Model                                                          | Poly4                                      |
| Equation                                                       | $y = A0 + A1*x + A2*x^2 + A3*x^3 + A4*x^4$ |
| Plot                                                           | 355                                        |
| A0                                                             | $1,17197 \pm 0,08841$                      |
| A1                                                             | $-0,00975 \pm 0,00221$                     |
| A2                                                             | $1,09584E-4 \pm 1,90236E-5$                |
| A3                                                             | $-4,36523E-7 \pm 6,79955E-8$               |
| A4                                                             | $5,51741E-10 \pm 8,6131E-11$               |
| Reduced Chi-                                                   | 0,92649                                    |
| R-Square (CO                                                   | 0,99471                                    |
| Adj. R-Square                                                  | 0,99235                                    |
| Polynomial parameters for LIR obtained under 355 nm excitation |                                            |
| Model                                                          | Poly4                                      |
| Equation                                                       | $y = A0 + A1*x + A2*x^2 + A3*x^3 + A4*x^4$ |
| Plot                                                           | 355                                        |
| A0                                                             | $1,17197 \pm 0,08841$                      |
| A1                                                             | $-0,00975 \pm 0,00221$                     |
| A2                                                             | $1,09584E-4 \pm 1,90236E-5$                |
| A3                                                             | $-4,36523E-7 \pm 6,79955E-8$               |
| A4                                                             | $5,51741E-10 \pm 8,6131E-11$               |
| Reduced Chi-                                                   | 0,92649                                    |
| R-Square (CO                                                   | 0,99471                                    |
| Adj. R-Square                                                  | 0,99235                                    |
| Polynomial parameters for LIR obtained under 520 nm excitation |                                            |
